# Supplementary material for: HIV-1 immune activation induces Siglec-1 expression and enhances viral trans-infection in blood and tissue myeloid cells
Source: PubMed Central journal article supplement (PMC4423124; doi:10.1186/s12977-015-0160-x), 2015-05-07
Supplement: 12977_2015_160_MOESM1_ESM.pdf [file 12977_2015_160_MOESM1_ESM.pdf]

## SUPPLEMENTARY FIGURE LEGENDS

### *Supplementary Figure 1*

**A.** Comparative binding of fluorescent VLPs to different myeloid cells previously exposed to 1000 U/ml of IFN $\alpha$  for 48 h. Cells were pulsed with VLPs for 3 h at 4°C and then assessed by FACS to measure the geometric mean fluorescence intensity (MFI). Data show mean values and SEM from two experiments including cells from six donors.

**B.** Relative binding of VLPs by different IFN $\alpha$ -treated myeloid cells that had been pre-incubated with 10  $\mu$ g/ml of the indicated mAbs before VLP exposure for 3 h at 4°C. Values are normalized to the level of VLP captured by mock-treated cells (set at 100%). Data show mean values and SEM from two experiments including cells from six donors.

**C.** Uptake of fluorescent VLPs by different myeloid cells previously exposed to 1000 U/ml of IFN $\alpha$  for 48 h. Cells were pulsed with VLPs for 3 h at 37°C and assessed by FACS to measure the geometric mean fluorescence intensity (MFI). Data show mean values and SEM from two experiments including cells from six donors.

**D.** Relative uptake of VLPs by different IFN $\alpha$ - treated myeloid cells that had been pre-incubated with 10  $\mu$ g/ml of the indicated mAbs before VLP exposure for 3 h at 37°C. Values are normalized to the level of VLP captured by mock-treated cells (set at 100%), and *P* values are calculated with a one sample t-test. Data show mean values and SEM from two experiments including cells from six donors.

***Supplementary Figure 2***

**A.** Uptake of VLPs by CD19<sup>-</sup>/CD3<sup>-</sup>/BDCA1<sup>-</sup>-tonsillar cells previously exposed to 1000 U/ml of IFN $\alpha$  or left untreated for 48 h. Cells were pre-incubated with 10  $\mu$ g/ml of the indicated mAbs before VLP exposure for 3 h at 37°C. Data show mean values and SEM from two experiments including cells from five donors.

**B.** Uptake of VLPs by CD19<sup>+</sup> tonsillar cells previously exposed to 1000 U/ml of IFN $\alpha$  or left untreated for 48 h. Cells were pre-incubated with 10  $\mu$ g/ml of the indicated mAbs before VLP exposure for 3 h at 37°C. Data show mean values and SEM including cells from two donors.

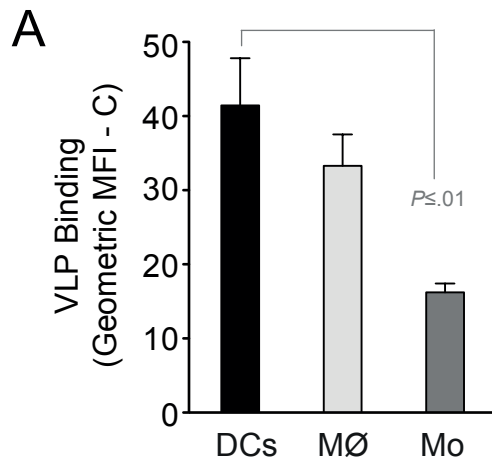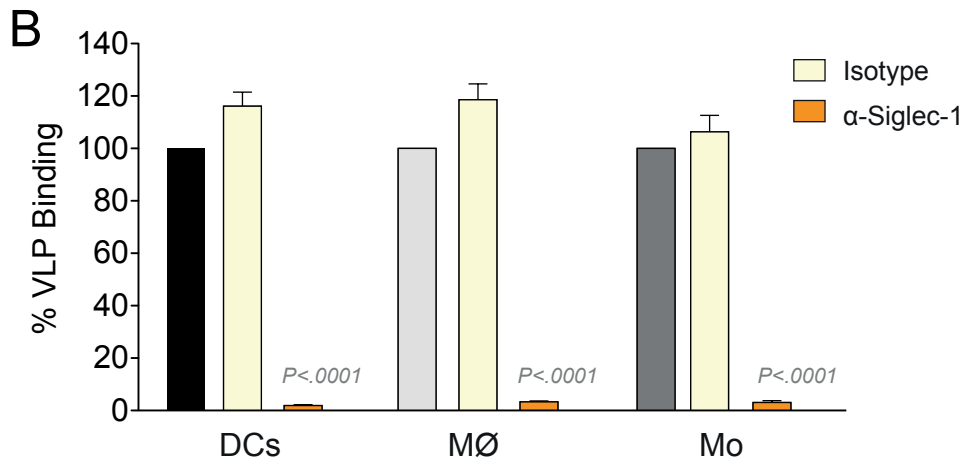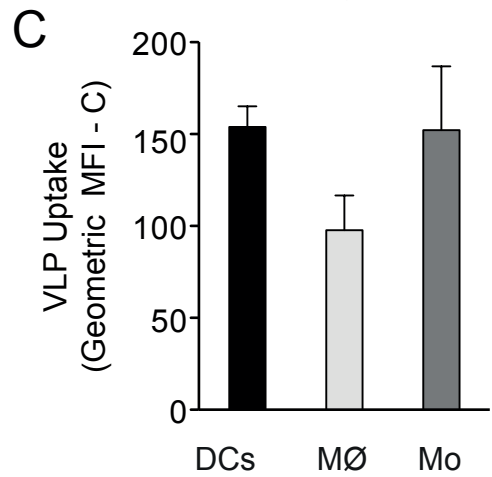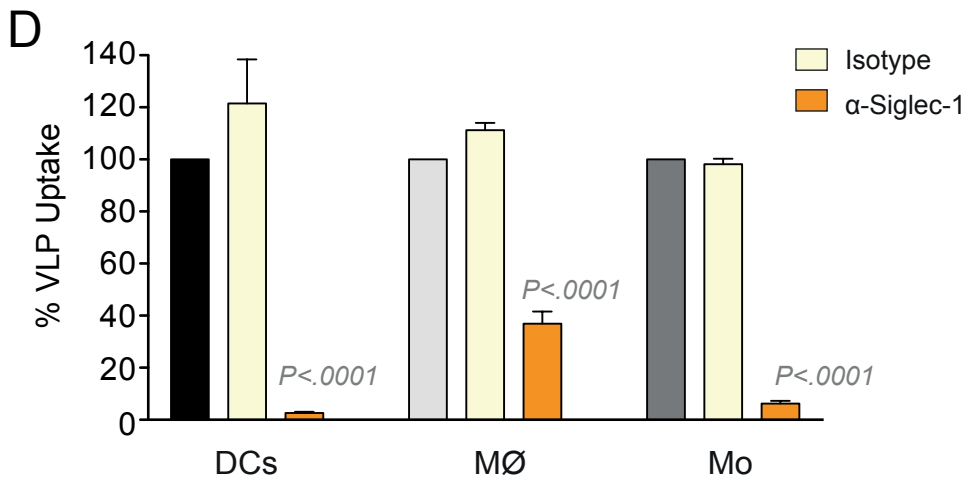

Supplemental Figure 1

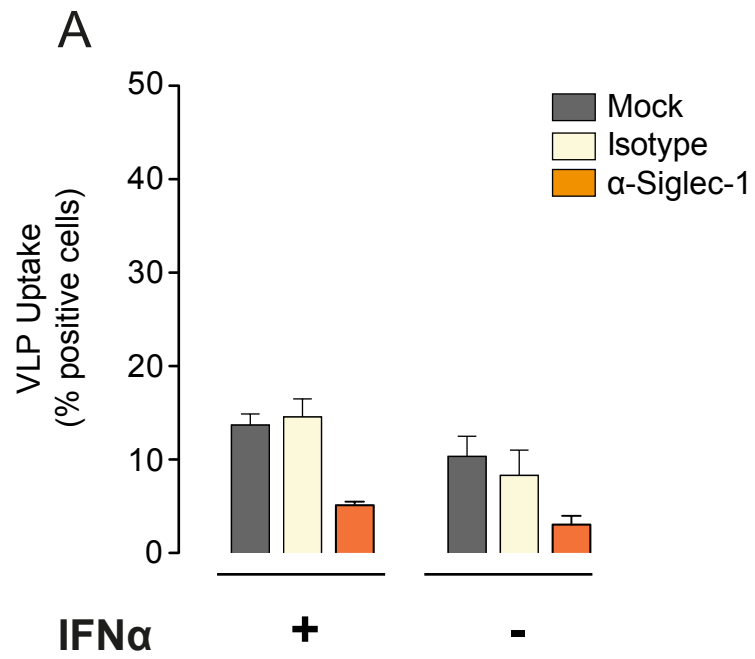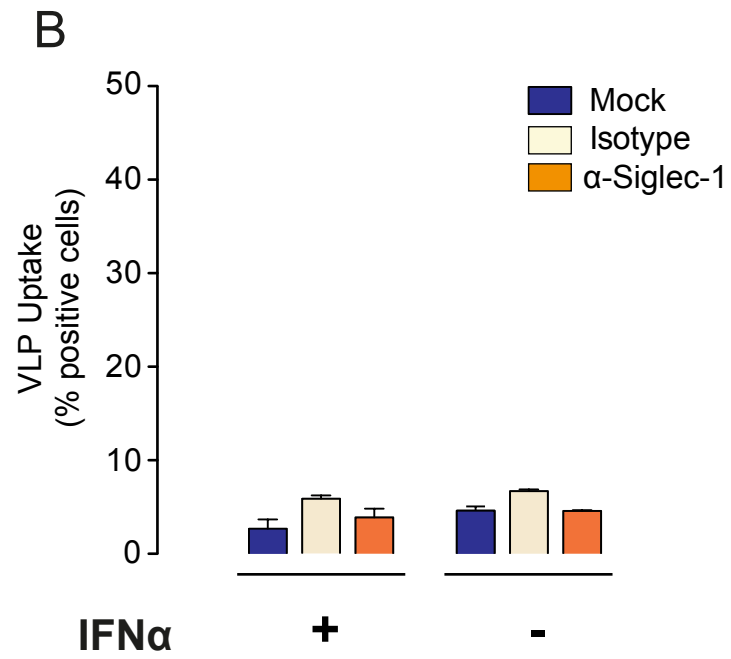

Supplemental Figure 2
